# Supplementary material for: Development and Validation of the Ability in Behavior Assessment and Interventions for Teachers Using Delphi Technique and Rasch Analysis
Source: Springer Nature journal article supplement (doi:10.1007/s10803-019-03887-4), 2019-01-12
Supplement: MOESM1 [file 16394726]

Appendix 1

*Functional Behavior Assessment (FBA):* Items 1-15 assess your knowledge in the area of FBA. Please choose only **one** response from the options provided for each item.

1. The primary purpose of conducting an FBA is
   1. To understand the form of challenging behavior for the purpose of intervention planning.
   2. To understand why a challenging behavior is occurring and what strategies to include within the behavior plan for the purpose of intervention planning.
   3. To understand how often challenging behavior occurs in a set period of time for the purpose of intervention planning.
   4. To understand how long it takes for challenging behavior to occur following an environmental trigger for the purpose of intervention planning.
2. The Motivational Assessment Scale (MAS), Functional Analysis Screening Tool (FAST) and Problem Behavior Questionnaire (PBQ) are examples of:
   1. Naturalistic Assessments.
   2. Experimental Analyses.
   3. Indirect Measures.
   4. Functional Analyses.
3. When a student engages in problem behavior in an attempt to gain a preferred item or activity, that behavior is said to have a/an:
   1. Tangible Function.
   2. Attention Function.
   3. Automatic/Nonsocial function.
   4. Escape Function.
4. Teachers will often miss the function of a challenging behavior because they are often preoccupied with a behavior’s ______________.

- 1. Frequency.
  2. Rate.
  3. Latency.
  4. Topography.

1. A teacher wants to increase the amount of time his kindergarten student remains on-task. What recording system would be most accurate for the teacher to use?
   1. Latency recording.
   2. Duration recording.
   3. Interval recording.
   4. Event Recording.
2. The main purpose of a scatterplot is to identify
   1. When (e.g., time of day/month) challenging behaviors are most likely to occur.
   2. The duration (e.g. how long it occurs) of challenging behavior.
   3. The frequency (e.g. how many times it occurs) of challenging behavior.
   4. The rate (e.g. how many times it occurs in a minute) of challenging behavior.
3. Which of the following is least likely to be assessed properly through FBA technology?
   1. Aggression.
   2. Tantrums.
   3. Self-injurious behavior.
   4. Depression.
4. The type of assessment where the teacher sets up a series of specific conditions in which antecedents and consequences are directly manipulated to assess their effect on problem behaviors within an appropriate experimental design is called:
   1. An Indirect Assessment.
   2. An ABC Assessment.
   3. A Functional Analysis.
   4. A Descriptive Analysis.
5. What recording system would be most appropriate for a teacher to use to assess the frequency of aggression occurring by a student in the classroom?
   1. Latency recording.
   2. Event Recording.
   3. Duration recording.
   4. Interval recording.
6. Operationally defined target behaviors are
   1. Behaviors that are defined in terms of observable events (i.e., something that can be seen or heard).
   2. Behaviors that are defined in terms of examples.
   3. Behaviors that two or more people can easily agree as to whether or not the behavior occurred.
   4. All of the above.
   5. None of the above.
7. Forced Choice preference assessments are used to identify potential reinforcers and involve the presentation of
   1. Three or more items at a time to the child.
   2. A single item at a time to the child.
   3. Two items at a time to the child.
   4. None of the above.
8. Which of the following assessments would be considered most accurate in identifying behavioral function for a child who engaged in aggression in the classroom?
   1. Functional Analysis.
   2. Functional Analysis Screening Tool (FAST).
   3. Behavioral Interviews.
   4. Scatterplot.
9. The Functional Analysis graph provided below suggests that the child’s disruptive behavior is primarily maintained by a/an:
   1. Escape Function.
   2. Tangible Function.
   3. Sensory Function.
   4. Attention Function.

1. What is the best preference assessment format that could be conducted with a student who has poor visual scanning skills, and severe physical impairments?
   1. Multiple stimulus presentation without replacement.
   2. Multiple stimulus presentation with replacement.
   3. Single stimulus presentation.
   4. All of them could be applied.
2. Multiple-stimulus presentations are often better than single-item presentations during preference assessments because they:
   1. Identify more reinforcers.
   2. Evaluate compliance as well as reinforcers.
   3. Show relative preferences among items.
   4. Are causal rather than correlational.

-------------------------------------------------------------------------------------------------------------------------

*Behavioral Intervention Plan (BIP):* Items 16-30 assess your knowledge in the area of BIPs. Please choose only **one** response from the options provided for each item.

1. Teachers who react to inappropriate behavior by providing the student with one-to-one attention run into the risk of maintaining the inappropriate behavior as it can result in an increase in the inappropriate behavior. This is an example of: ______________.
   1. Positive reinforcement.
   2. Negative reinforcement.
   3. Extinction.
   4. Punishment.
2. When selecting components of a Behavior Intervention Plan (BIP), which one of the following aspects should be considered the most important for consideration?
   1. The diagnosis of the child.
   2. The topography of challenging behaviors.
   3. The function of challenging behaviors.
   4. Commonly used behavioral intervention practices.
3. Gregory raises his hand in class for the first time. His teacher subsequently provides descriptive praise for Gregory’s hand-raising behavior. If Gregory never raises his hand again in class, the teacher’s praise may have functioned as:

- 1. Positive reinforcement.
  2. Negative reinforcement.
  3. Extinction.
  4. Punishment.

1. Functional Communication Training is an example of which of the following strategies?
   1. Differential Reinforcement of Other behavior.
   2. Differential Reinforcement of Alternative behavior.
   3. Response Cost.
   4. Non-contingent Reinforcement.
2. A student with limited verbal skills (e.g.,1-2 words) engages in aggression to escape work demands. Which of the following strategies would be the best option for intervention?
   1. Teaching appropriate communication to request break from work.
   2. An Exclusionary Time Out from work demands.
   3. Reprimanding the child to stop the challenging behavior.
   4. Taking away privileges earned.
3. When students get out of completing a task by engaging in an inappropriate behavior, that behavior is said to be maintained by:
   1. Positive reinforcement.
   2. Extinction.
   3. Negative reinforcement.
   4. Punishment.
4. When teaching a student a complex set of skills such as learning to use a phone, which strategy or strategies would be effective?
   1. Task Analysis.
   2. Least to Most Prompting Sequence.
   3. Differential Reinforcement of Alternative Behavior (i.e. compliance).
   4. All of the above.
5. A student has learned to request teacher attention by raising his hand to ask for help, however he frequently engages in requesting behavior which makes it difficult for the teacher to attend to other students in the class. Which one of the following strategies could the teacher employ to keep this student’s requesting behavior at appropriate levels?
   1. Differential Reinforcement of Low Rates.
   2. Differential Reinforcement of Alternative Behavior.
   3. Differential Reinforcement of Other Behavior.
   4. Extinction.
6. To facilitate compliance with students who engage in escape-maintained challenging behavior, which one of the following antecedent strategies could be used to prevent the occurrence of challenging behavior?
   1. Time Out.
   2. ”First and then” Visual Cards.
   3. Contingent Praise.
   4. Taking away privileges earned.
7. ____________ is a punishment-based procedure in which previously earned privileges are removed in an attempt to reduce a challenging behavior.
   1. Exclusionary Time Out
   2. Overcorrection
   3. Response Cost
   4. Token Economy
8. For challenging behavior maintained by sensory/automatic reinforcement, which intervention strategy would be most effective?
   1. Non-Contingent Reinforcement.
   2. Reprimands.
   3. Non-Exclusionary Time Out.
   4. Response Cost.
9. Which one of the following strategies could be used to prevent prompt dependency when teaching skills to students?
   1. Using a most to least prompting sequence.
   2. Using a least to most prompting sequence.
   3. Using prompt fading.
   4. Using a task analysis.
10. When developing a behavioral intervention plan for a student who engages in aggression maintained by access to tangibles or preferred items, which one of the following strategies would you employ first?
    1. Response Cost.
    2. Differential Reinforcement of Alternative Behavior.
    3. Exclusionary Time Out.
    4. Overcorrection.
11. You maintain the potency of preferred items by
    1. Not having them freely available during all times of the day.
    2. Conducting preference assessments regularly to evaluate if there is a decrease in preference.
    3. Providing choices of preferences via a preference menu.
    4. Doing all of the above.
12. Pre-correction is applied
    1. After students break a rule.
    2. As an example to other students.
    3. To help students succeed when making transitions.
    4. Only after a behavior problem has occurred.

--------------------------------------------------------------------------------------------------------------------------
